# Supplementary material for: The Primary Antisense Transcriptome of Halobacterium salinarum NRC-1
Source: MDPI journal article supplement (doi:10.3390/genes10040280), 2019-04-05
Supplement: s1 [file s1]

Article

# The primary antisense transcriptome of *Halobacterium salinarum* NRC-1

João Paulo Pereira de Almeida <sup>1,§</sup>, Ricardo Z. N. Vêncio <sup>2,§</sup>, Alan P. R. Lorenzetti <sup>1</sup>, Felipe ten-Caten <sup>1</sup>, José Vicente Gomes-Filho <sup>1</sup> and Tie Koide <sup>1,\*</sup>

<sup>1</sup> Department of Biochemistry and Immunology, Ribeirão Preto Medical School, Universidade de São Paulo, Brazil

<sup>2</sup> Department of Computation and Mathematics, Faculdade de Filosofia, Ciências e Letras de Ribeirão Preto, Universidade de São Paulo, Brazil

§ authors contributed equally

\* Correspondence: [tkoide@fmrp.usp.br](mailto:tkoide@fmrp.usp.br); Tel.: +55-16-3315-3107

## Supplemental Figures

16

17

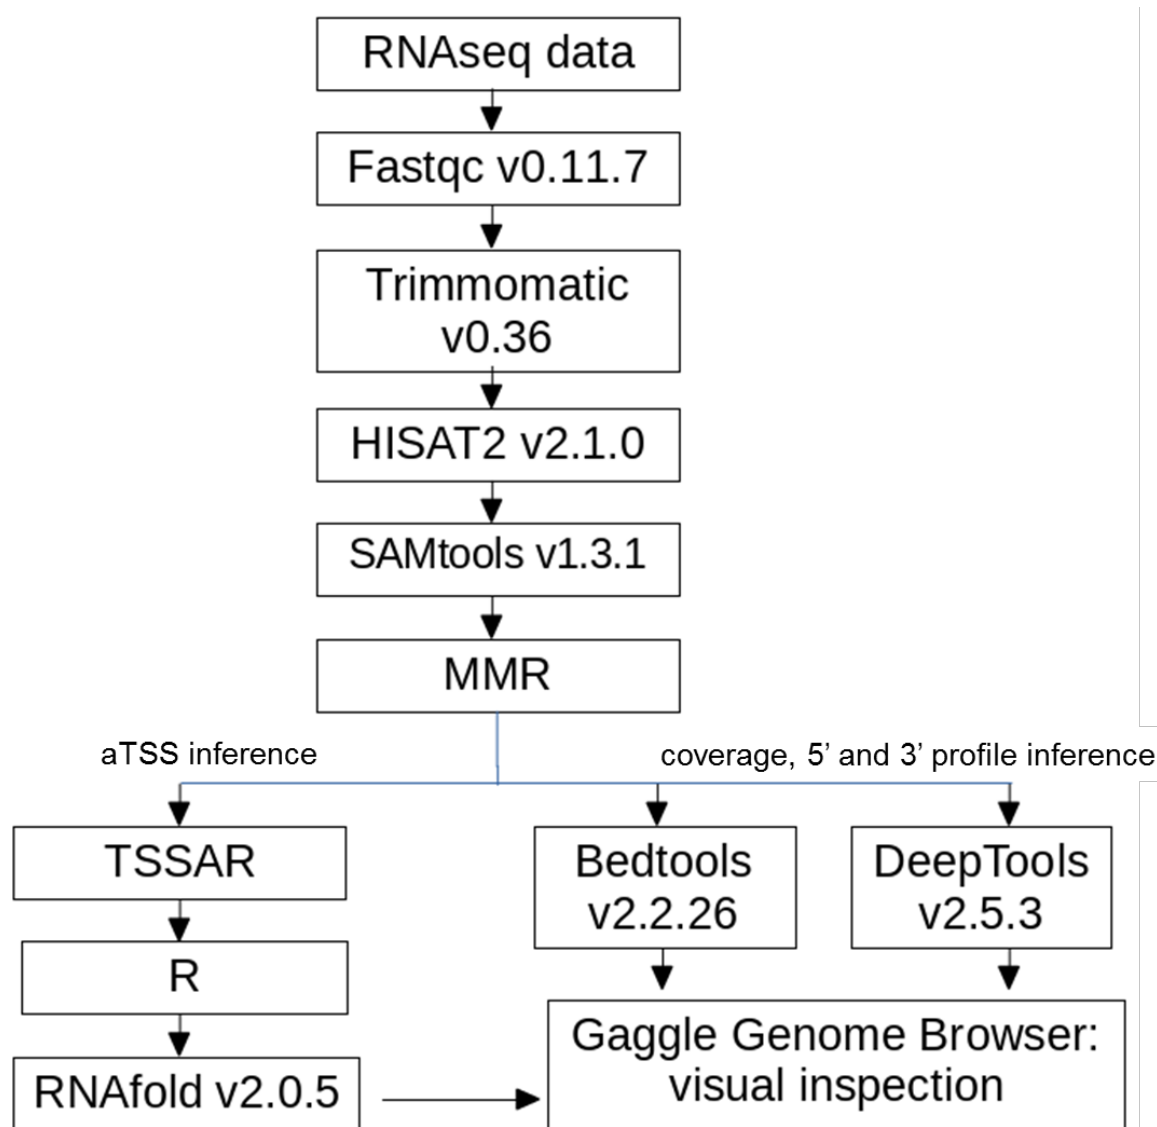

19**Figure S1.** Pipeline for asRNA annotation.

20

21

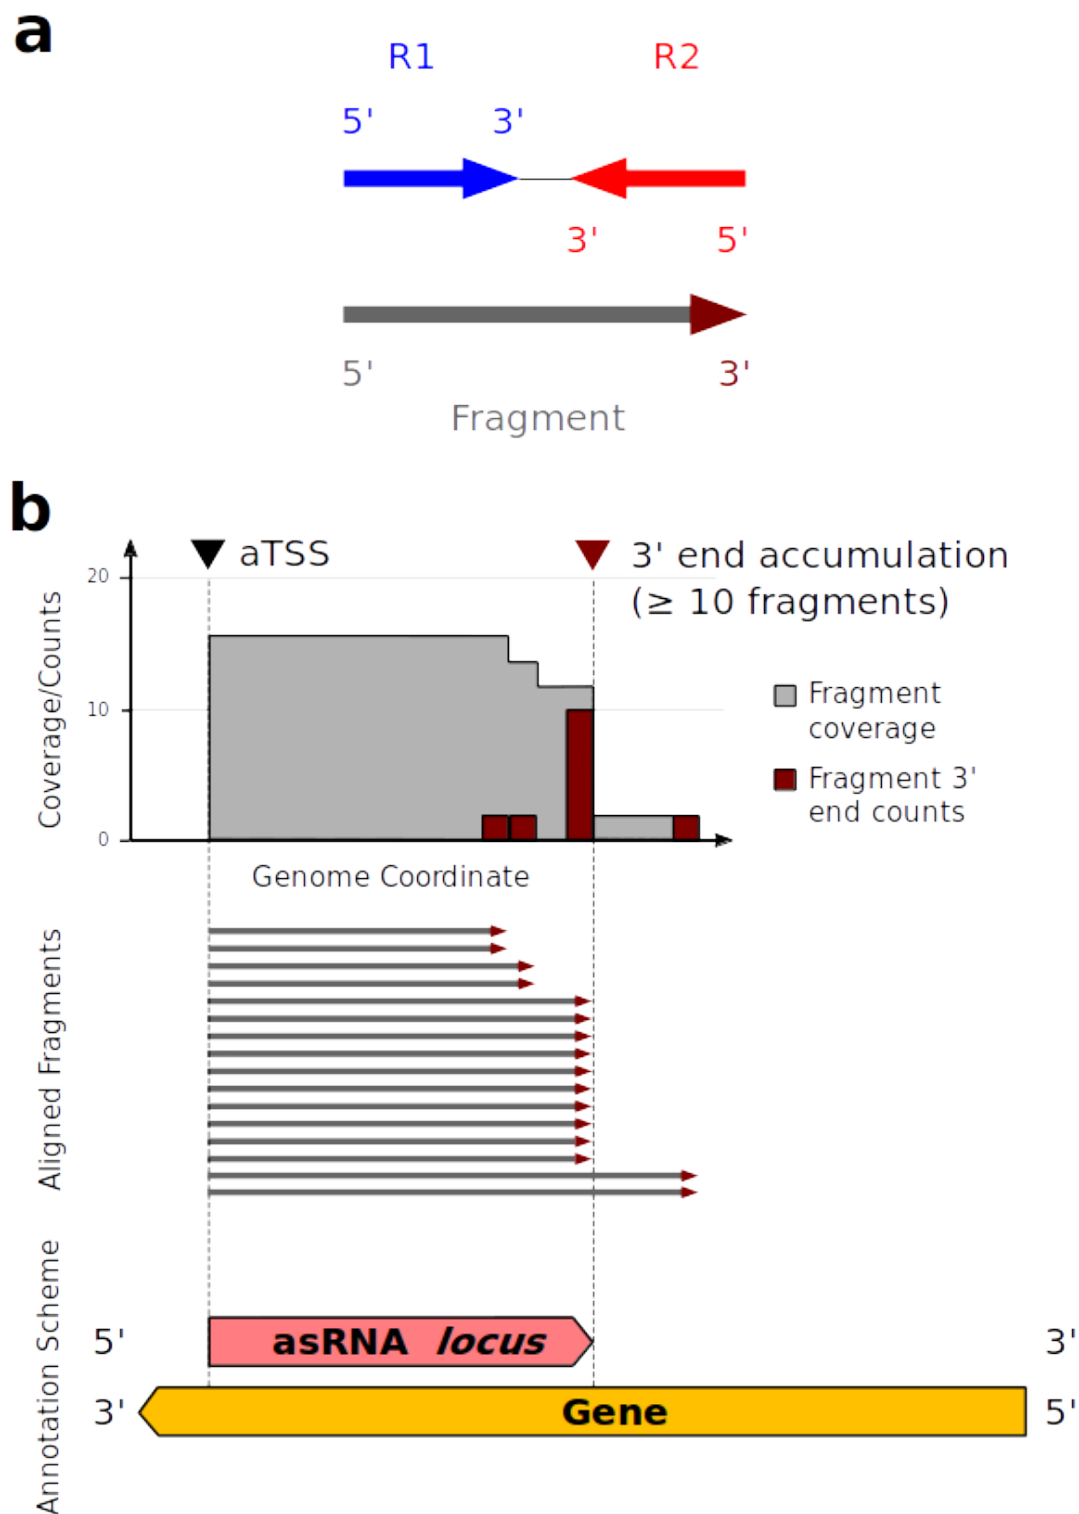

**Figure S2.** asRNA *loci* inference approach. (a) Reads aligned as a pair (R1-R2; blue and red arrows, respectively) are a representation of an existent RNA fragment (grey line with brown arrowhead), since our RNA library preparation protocol ligates adapters directly to 5' and 3' ends of RNA molecules. Furthermore, we can extrapolate that orphan R2 reads aligned using single-end mode also have implicit information about the ending position of a fragment. (b) In our approach, the minimum size of an asRNA locus (pink arrow) can be inferred by mapping its beginning (black triangle), given by an aTSS position, and its minimum ending position (brown triangle), given by the accumulation of at least 10 observations of fragment 3' ends.

31  
32  
33  
34  
35  
36(a)  
  
38  
39(b)  
40  
41  
42  
43  
44  
45  
46  
47  
48  
49  
50  
51  
52  
53

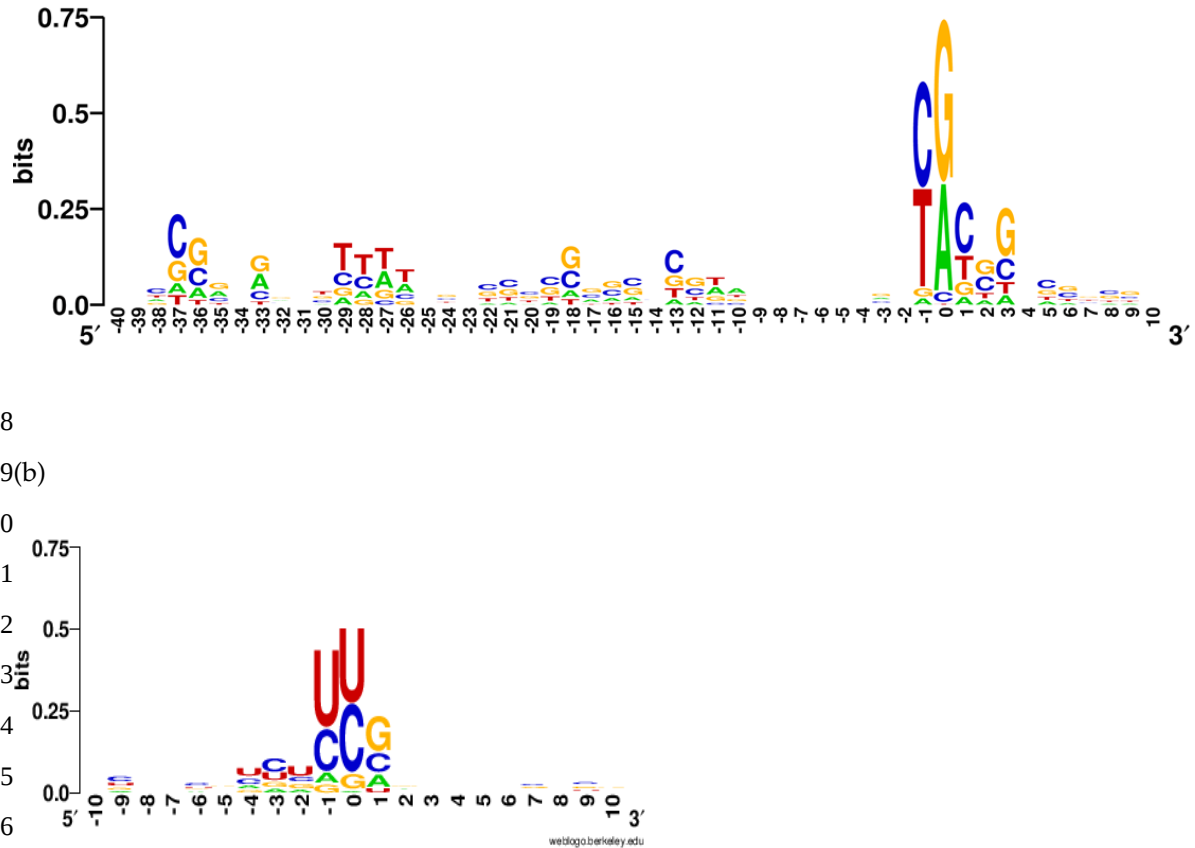

**Figure S3.** asRNA properties. (a) Promoter analysis: frequency of nucleotides 40 nt upstream and 10 nt downstream of aTSS (position 0). (b) Frequency of nucleotides at the 3' end of asRNAs. Position 0 is the last nucleotide.

54 (a)

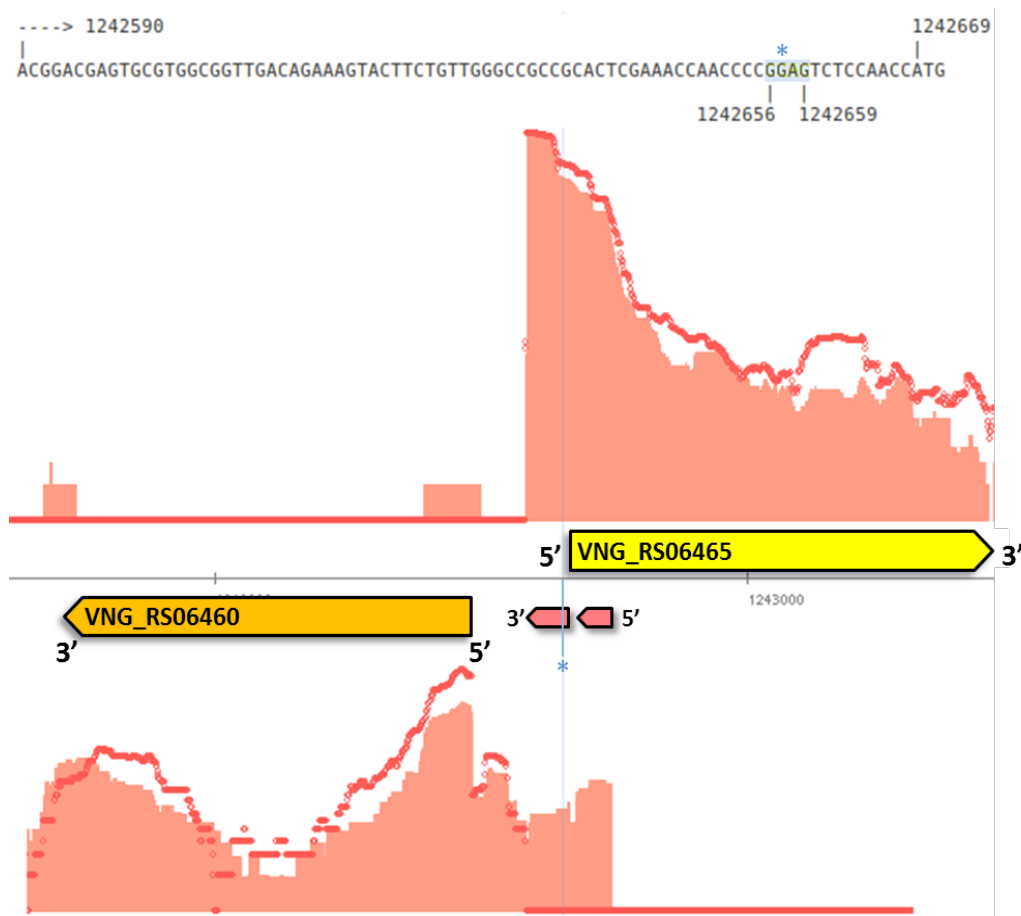

56 (b)

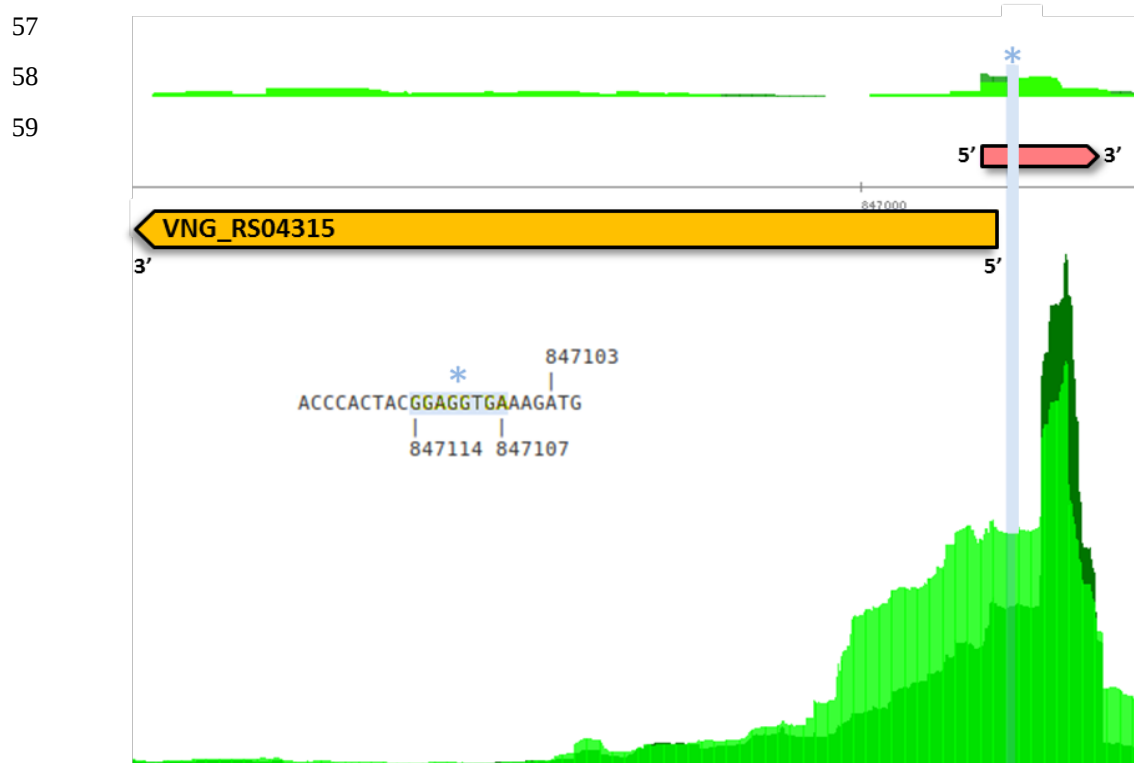

**Figure S4.** Examples of putative RBS occlusion by an asRNA. (a) *cdcH*, encoding an AAA-type ATPase (VNG\_RS06465). VNG\_RS06465 locus (yellow arrow) is in forward strand (5'→3' left to right), neighbor gene VNG\_RS06460 (orange arrow) is in reverse strand (5'→3' right to left). Aligned reads coverage along genomic coordinates for TEX+ libraries at exponential and stationary phases are shown in light red (solid) and red (dots), respectively ( $\log_2$  counts jointly normalized and arbitrarily scaled). VNG\_as06465\_925 asRNA (pink arrow) encompasses Shine-Dalgarno-like signature (\* light blue highlight). (b) *rpl1* encoding the 50S ribosomal protein L1. VNG\_RS04315 locus (orange arrow) in reverse strand (5'→3' right to left). dRNA-seq read coverage signal is shown in dark and light green for TEX+ and TEX- libraries, respectively. VNG\_as04315\_654 asRNA (pink arrow) encompasses Shine-Dalgarno-like signature (\* light blue highlight in genome coordinates and zoomed in sequence).

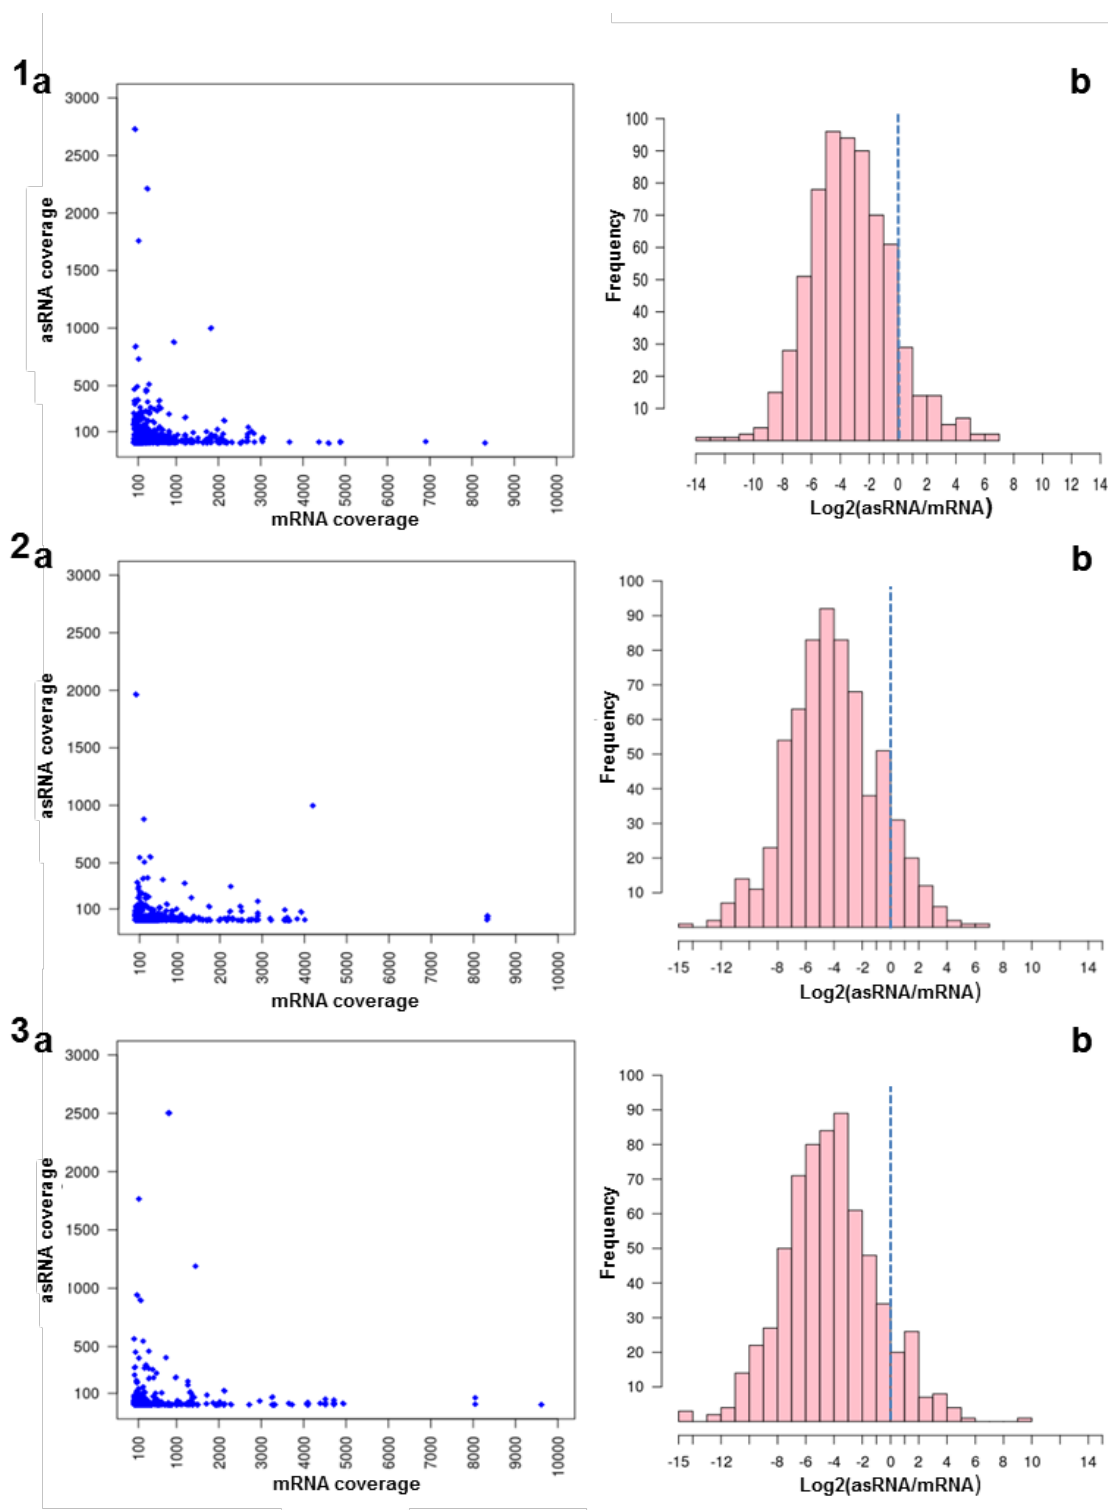

**Figure S5.** Coverage of asRNAs relative to mRNAs on the opposite strand. (a) Coverage of mRNAs (x-axis) and coverage of asRNAs (y-axis). (b) Histogram of  $\log_2$  fold change of asRNA coverage relative to mRNA on the opposite strand; vertical dotted lines mark 1:1 expression levels. (1) stationary phase -17 h, (2) beginning of exponential phase -37 h, (3) gas vesicles release phase -86 h.

79(a)

80

| Log2FC      |      |      |              |                                                   |
|-------------|------|------|--------------|---------------------------------------------------|
| aTSS_2145   | 3.6  | 1.2  | VNG_RS12020  | type IV pilin                                     |
| aTSS_617    | 3.6  | 1.3  | VNG_RS04115  | hypothetical protein                              |
| aTSS_1347   | 2.7  | 3.1  | VNG_RS09530  | argininosuccinate lyase                           |
| daTSS_80    | 2.3  | 2.3  | VNG_OE5069A1 | conserved hypothetical protein                    |
| ● aTSS_1949 | 2    | -1   | VNG_OE5075F  | conserved hypothetical protein                    |
| ● aTSS_1426 | 1.8  | 3.3  | VNG_OE4600F  | hypothetical protein                              |
| daTSS_68    | 1.2  | 2.6  | VNG_RS12750  | hypothetical protein                              |
| aTSS_49     | 1.2  | -1.3 | VNG_RS00175  | cell division control protein Cdc6                |
| ● aTSS_810  | -1   | 1.4  | VNG_RS05605  | hypothetical protein                              |
| daTSS_3     | -1.4 | 2.7  | VNG_RS00140  | type II toxin-antitoxin system HicA family toxin  |
| aTSS_390    | -2   | -1.5 | VNG_RS02565  | oxidoreductase                                    |
| aTSS_1736   | -2   | -1.3 | VNG_RS12765  | site-specific integrase                           |
| daTSS_82    | -2.1 | 1.9  | VNG_RS13545  | hypothetical protein                              |
| aTSS_84     | -2.2 | -2.2 | VNG_RS00235  | hypothetical protein                              |
| aTSS_32     | -2.4 | -1.1 | VNG_RS00115  | hypothetical protein                              |
| ● aTSS_742  | -2.6 | 1.2  | VNG_RS05060  | class IV adenylate cyclase                        |
| aTSS_184    | -2.7 | 1.2  | VNG_RS00870  | integrase                                         |
| aTSS_231    | -2.8 | 1    | VNG_RS01200  | ATP-dependent protease LonB                       |
| aTSS_20     | -2.8 | 1.5  | VNG_RS00105  | transposase                                       |
| aTSS_1884   | -2.9 | -1.4 | VNG_RS11055  | transferase                                       |
| aTSS_701    | -2.9 | -1.6 | VNG_RS04790  | cell division control protein Cdc6                |
| aTSS_1735   | -3   | -1.3 | VNG_RS12765  | site-specific integrase                           |
| aTSS_908    | -3.1 | 1.8  | VNG_RS06345  | halocyanin                                        |
| ● aTSS_1321 | -3.6 | -3.2 | VNG_RS09335  | ribonucleotide-diphosphate reductase subunit beta |
| ● aTSS_539  | -3.6 | 1.7  | VNG_RS03715  | hypothetical protein                              |
| aTSS_33     | -5.9 | -1.1 | VNG_RS00115  | hypothetical protein                              |

82

83

84

85



86(b)

87

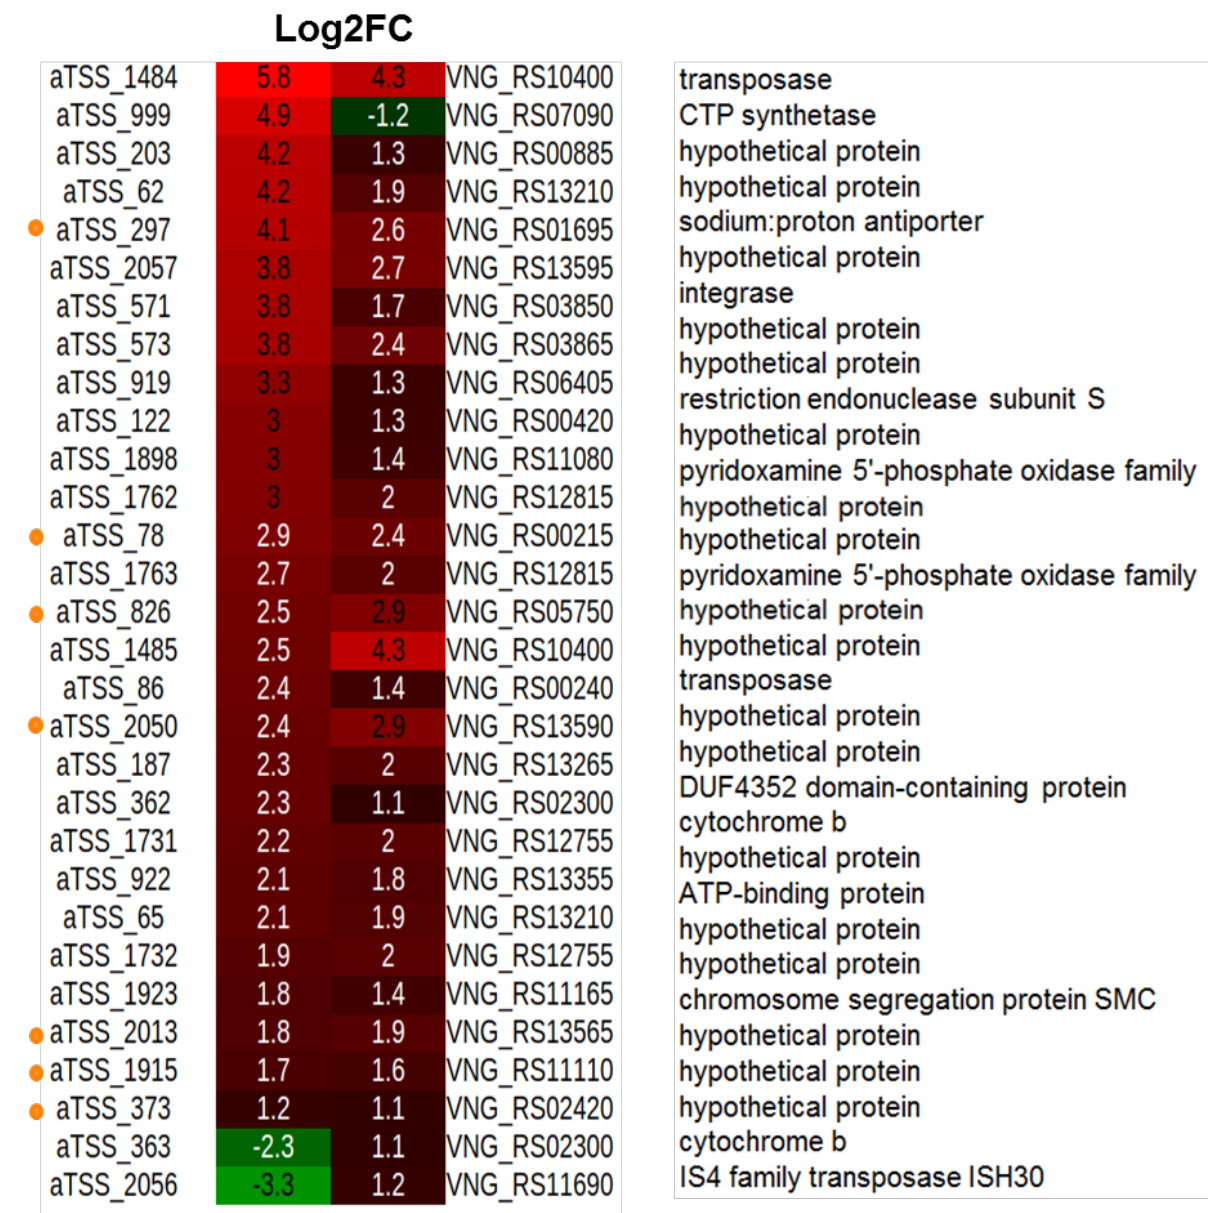

89

90**Figure S6.** Differential expression of asRNAs and mRNAs on the opposite strand. Pairs asRNA/mRNA that  
91presented either positive or negative correlation are shown. Up-regulated genes have its log fold change  
92(log<sub>2</sub>FC) inside red cells and down-regulated genes inside green cells. (a) log<sub>2</sub>FC for 37 h/17 h (b) log<sub>2</sub>FC for 86  
93h/37 h. Orange dots highlight asRNAs overlapping the 5' UTR of the mRNA.

94

95

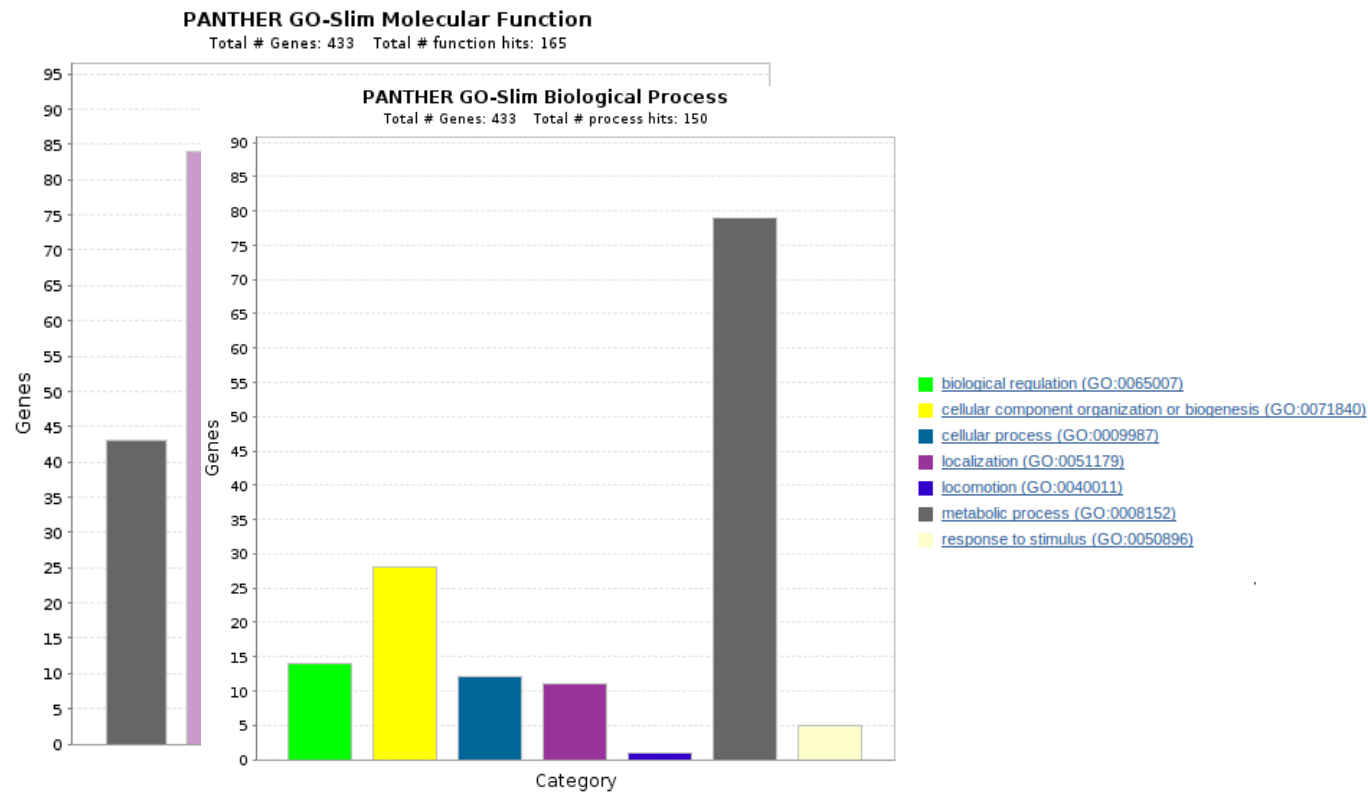

97

98

99

100

101

102

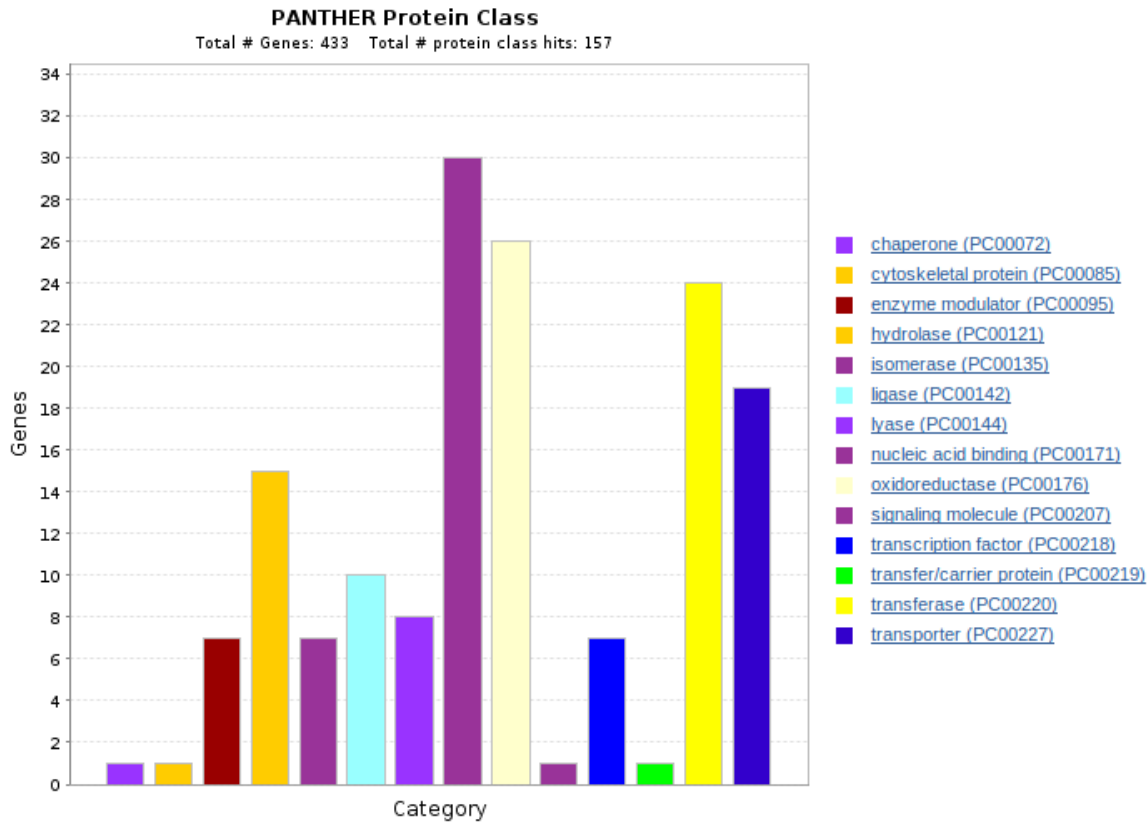

**Figure S7.** Functional categorization of genes presenting asRNAs according to Gene Ontology (GO). PANTHER tool was able to classify 433 genes out of the 613 submitted. Panels show molecular function, biological processes and protein classes, respectively.

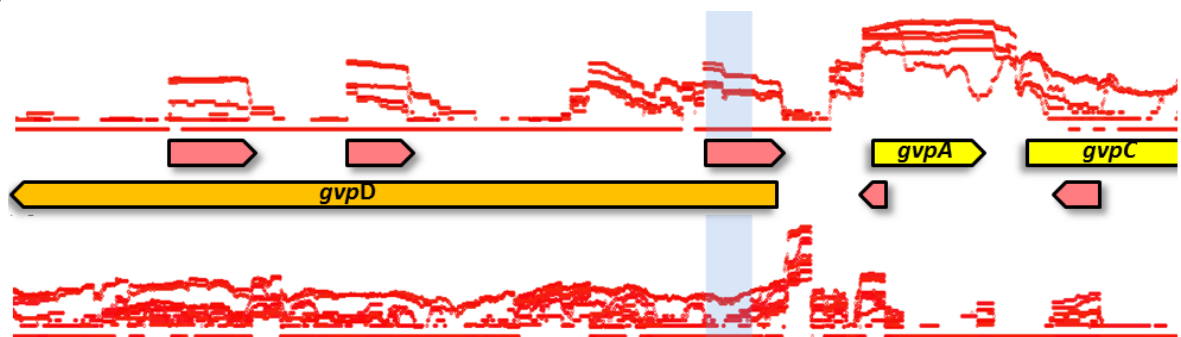

**Figure S8.** asRNAs in *gvp* genes. Upper panel shows RNA-seq log<sub>2</sub> counts for forward strand, and lower panel shows signal for the reverse strand. All sequenced libraries are shown simultaneously and normalized (profiles as red dots). Genes *gvpA* and *gvpC* in forward strand (yellow arrows) and *gvpD* in reverse strand (orange arrow). Annotated asRNAs are represented by pink arrows. asRNAs related to *gvp* genes showed mean expression levels lower than their cognate genes. Region corresponding to the probe used for asRNA detection by Krüger and Pfeifer (1996) is highlighted in light blue.

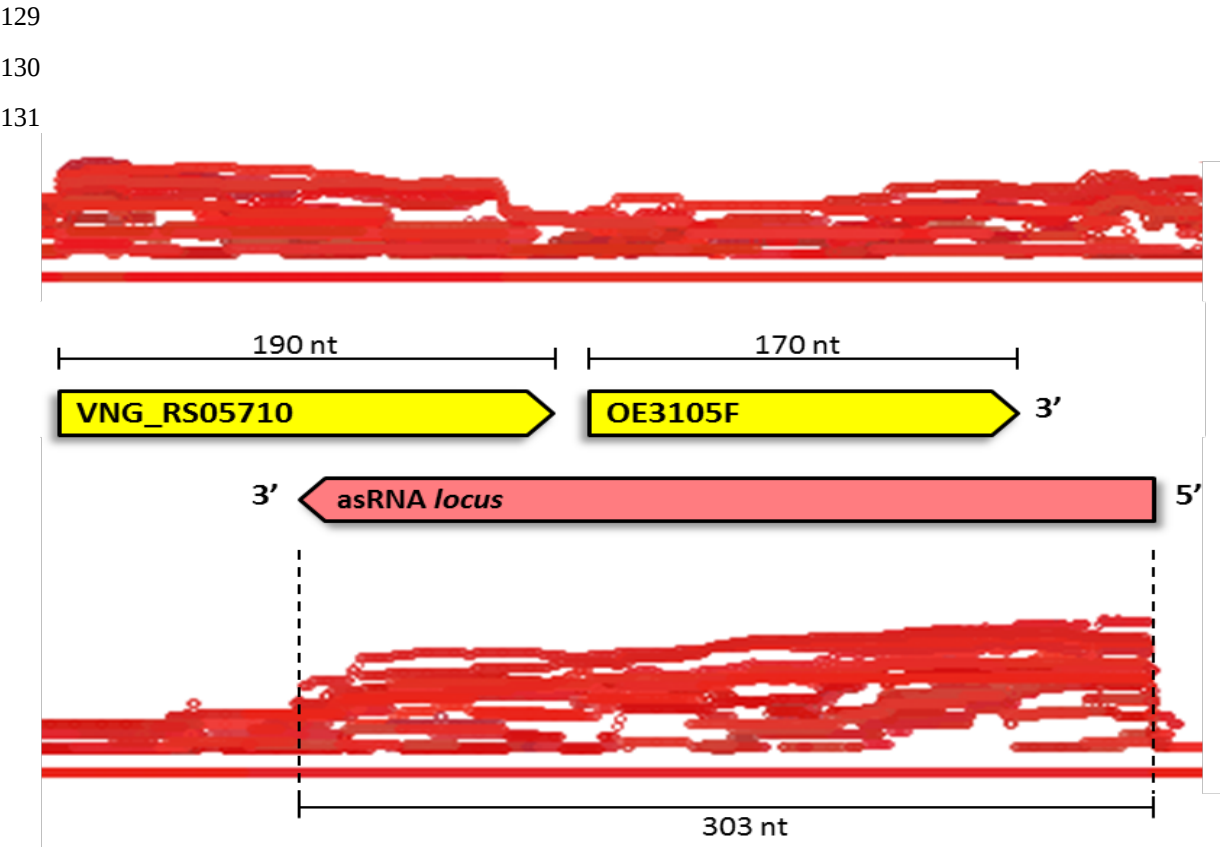

**Figure S9.** asRNAs in *brb* and *brz* genes. Upper panel shows RNA-seq log<sub>2</sub> counts for forward strand, and lower panel shows signal for the reverse strand. All sequenced libraries are shown simultaneously and normalized (profiles as red dots). *brz* (VNG\_RS05710) and *brb* (OE3105F) are on the forward strand (yellow arrows) and annotated asRNA (VNG\_da3105F\_36) on the reverse strand (pink arrow).

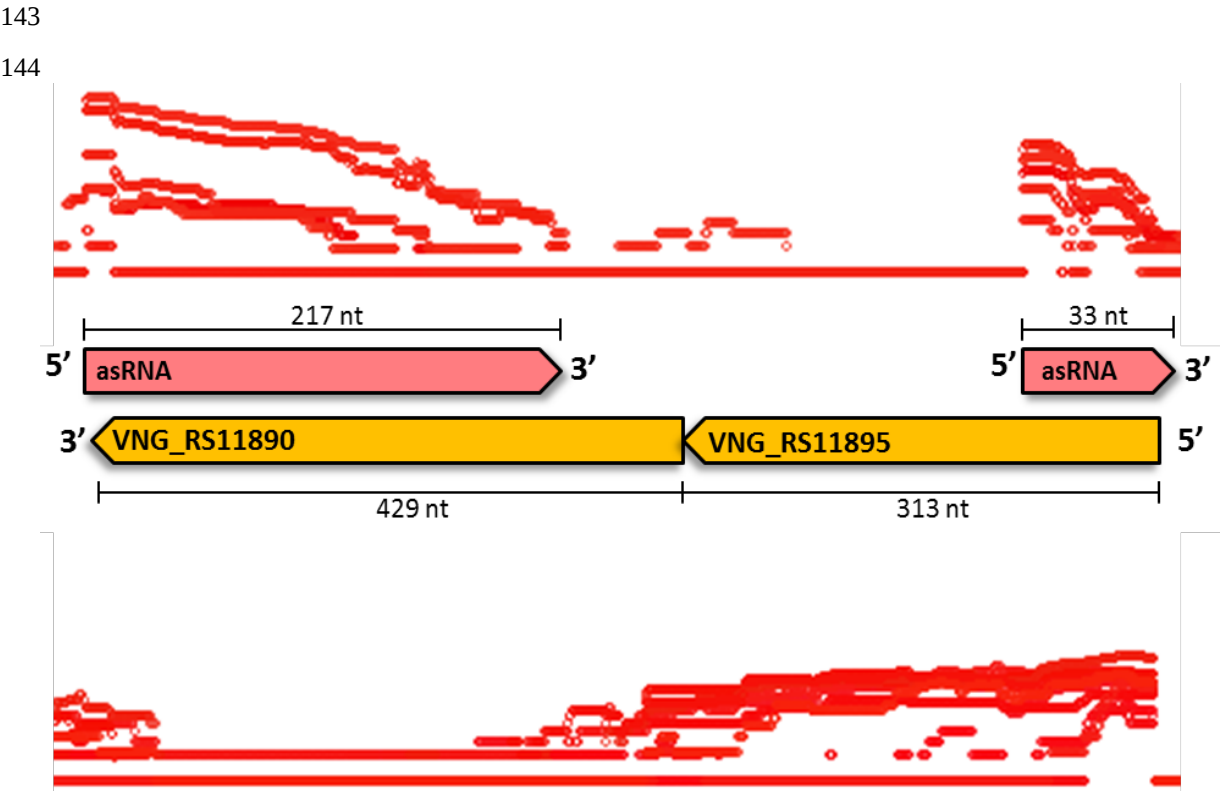

**Figure S10.** asRNAs in type II TA system. Upper panel shows RNA-seq log<sub>2</sub> counts for forward strand, and lower panel shows signal for the reverse strand. All sequenced libraries are shown simultaneously and normalized (profiles as red dots). Genes VNG\_RS11890 (toxin) and VNG\_RS11895 (antitoxin) are on the reverse strand (orange arrows) and their respective annotated asRNAs VNG\_da11890\_90 and VNG\_as11895\_2118 on the forward strand (pink arrows).

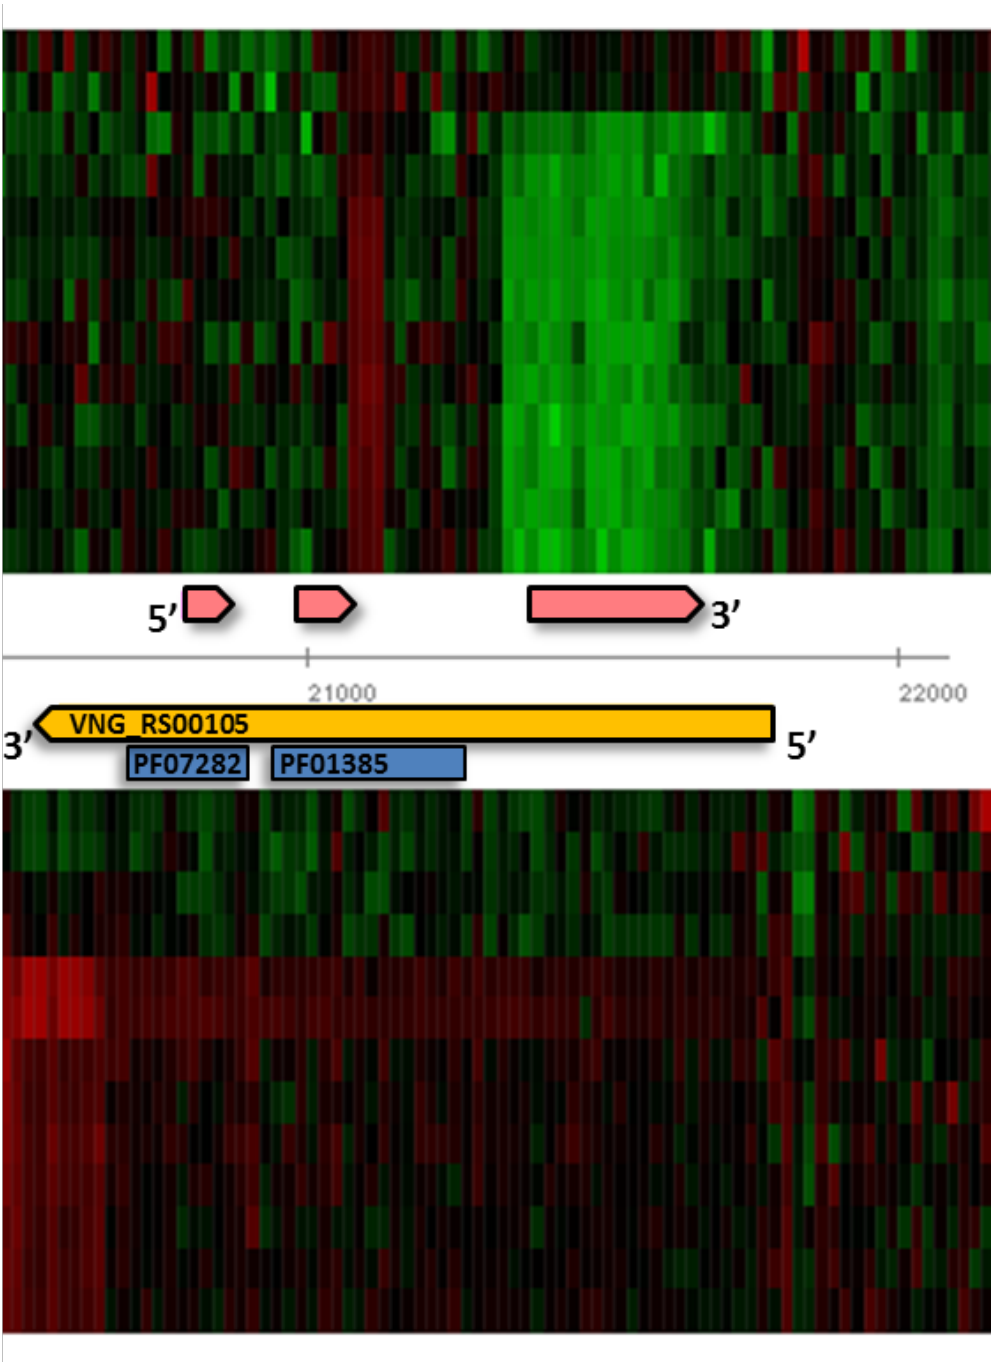

**Figure S11.** asRNAs antisense to a transposase differentially expressed along the growth curve. VNG\_RS00105 (orange arrow) encodes a transposase on the reverse strand (5'→3' right to left), PFAM domains are shown in blue. asRNAs are shown in pink arrows on forward strand (5'→3' left to right). Upper and lower panels show tiling array expression data over a growth curve (Koide *et al.*, 2009) for forward and reverse strand, respectively. Each line represents one point in the growth curve. Heat map is color coded: green shows down-regulation and red up-regulation relative to reference condition.

170(a)

171

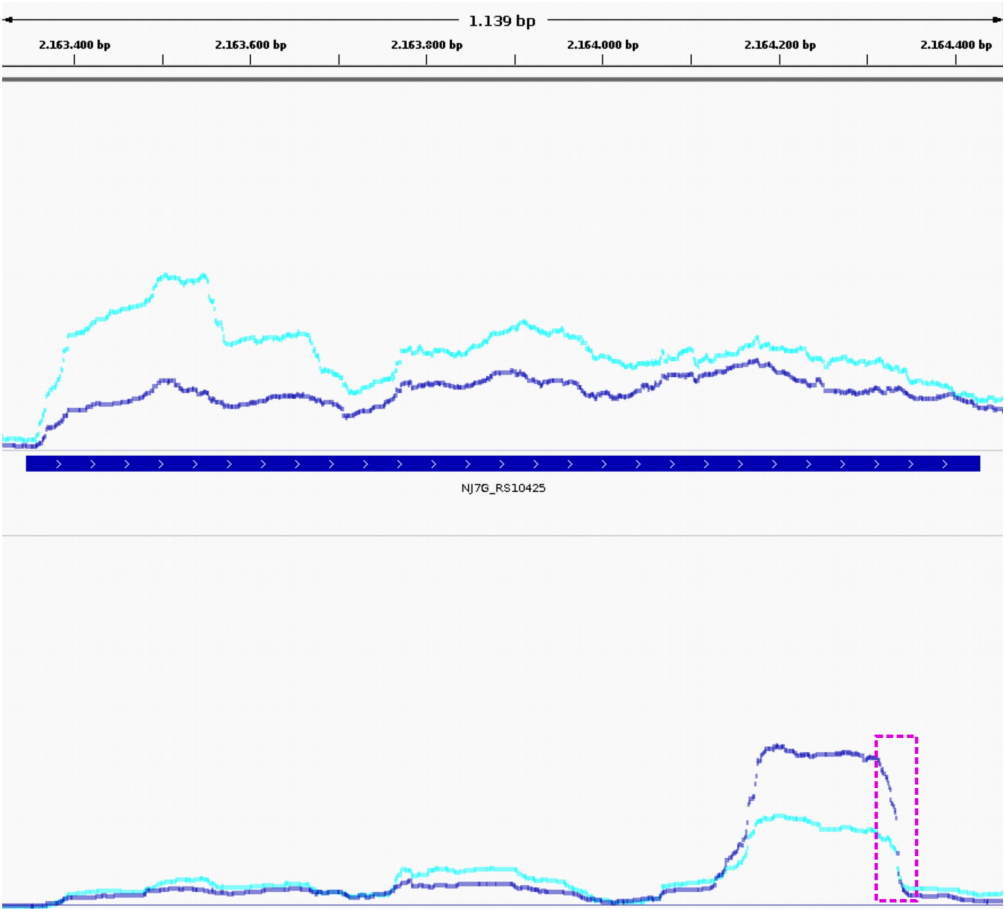

173(b)

174

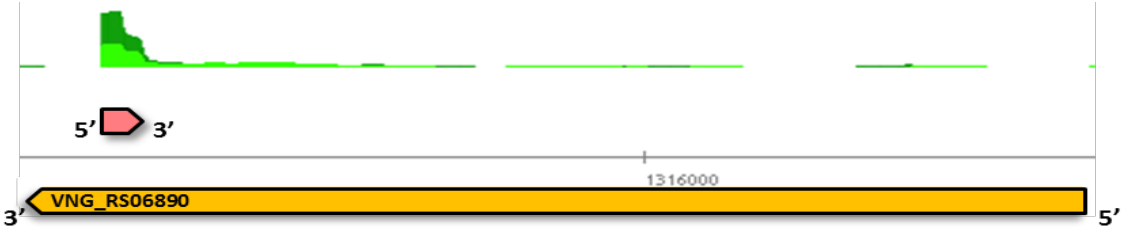

**Figure S12.** Differential expression of putative asRNAs antisense to the *nirH* gene in *Natrinema* sp. J7-2. (a) Genomic region showing normalized read coverage for low (15% NaCl; light blue) and high (30% NaCl, dark blue) salt concentrations, respectively. The y-axes range from 0 to 500 counts. CDS in *Natrinema* sp. J7-2 (blue rectangle) is shown at forward strand (5'→3' left to right). Signals above and below the blue rectangle are for forward and reverse strands, respectively. A highlight box (magenta) indicates the approximate asRNA locus position identified in *H. salinarum*. (b) *H. salinarum* dRNA-seq read coverage signal is shown in dark and light green for TEX+ and TEX-libraries, respectively (5'→3' right to left). AsRNA locus position is highlighted (magenta). Coverage signal above the axis is for forward strand.



187

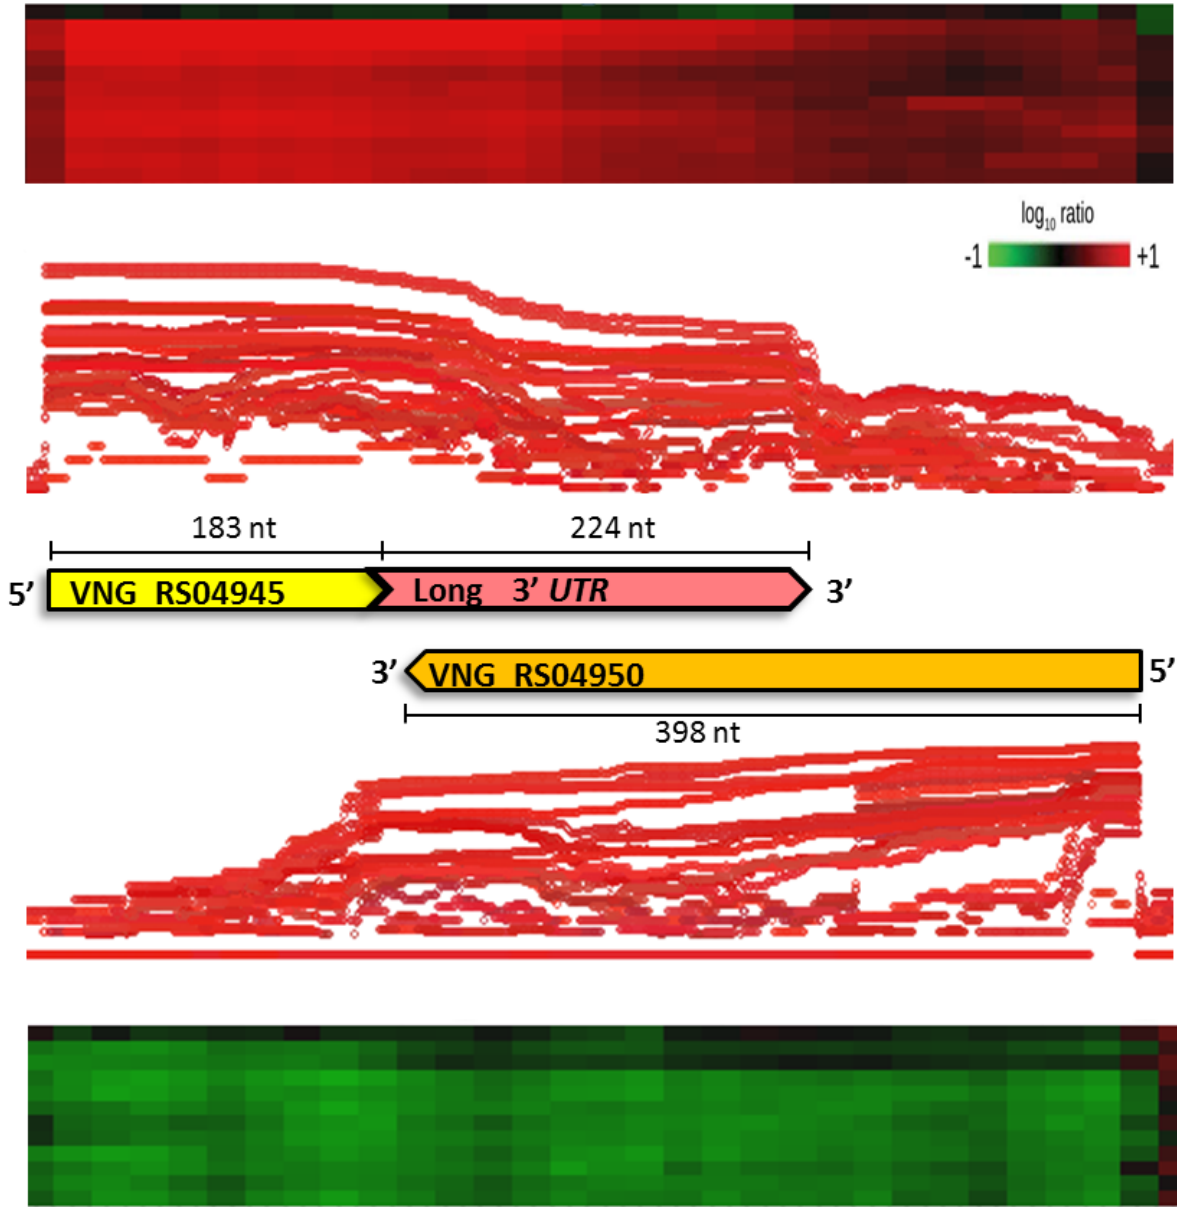

189 **Figure S13.** Long 3' UTR of a coding sequence acting as an asRNA. Pink arrow indicates a possible  
190 long 3' UTR of the gene VNG\_RS04945 (yellow arrow, annotated as hypothetical protein) which  
191 could act as an asRNA of the gene VNG\_RS04950 (orange arrow, annotated as a subunit of a  
192 translation initiation factor). Upper panel shows tiling array expression data for the forward strand  
193 and lower panel for the reverse (Koide *et al.* 2009). Red lines show RNA-seq signal ( $\log_2$  counts per  
194 position).

195

196

197

198
